# Supplementary material
Source: MDPI journal article supplement (https://www.mdpi.com/1996-1073/17/3/560)
Supplement: s1 [file s1]

Archive with 3 entries (3 files):
- Supplementary A.xlsx
- Supplementary B.pdf
- Supplementary C.pdf
