# Supplementary material
Source: MDPI journal article supplement (https://www.mdpi.com/1996-1073/17/3/560)
Supplement: s1 [file s1 › Supplementary A.xlsx]

## Sheet: Supplementary A
					Supplementary Material A is composed of three tables displaying the LCI for the F-CUBED Production System for each residual biomass stream, i.e., pulp and paper bio-sludge (Tables A1), olive pomace (Tables A2), and orange peel (Tables A3).

## Sheet: Table S1-Pulp&Paper Biosludge
		Process	Sub-process	Unit process - Input	Values	Units	Type of source	Unit process - Output	Sub-process	Values	Units	Type of source
	UPSTREAM	Waste Water Treaatment	Land Use Change	Forest land transormation	0.008456	m2	Foreground	Biological sludge (3,5%, DM)	Product	0.0989011	t wb/tADp	Foreground
				Occupation, industrial area	0.000155035	m2a	Foreground	Treated water stream	Product	17.9011	t/tADp	Background
			WWT	Waste water from idustrial process	18	t/tADp	Background
				Urea (46%)	0.5686	kg/tADp	Foreground
				Phosphoric acid (85%)	0.1717	kg/tADp	Foreground
				Building construction	0.000155035	m2/tADp	Foreground
				Pipeline long distance	1.26335e-07	km/tADp	Foreground
			Electricity/heat	Electricity, medium voltage, Sweden country-mix	8	kWh/tADp	Background
		Enhanced Bio-sludge	Biogenic residues	Biological sludge (3,5%, DM)	0.0989011	t wb/tADp	Foreground	Enhanced Bio-sludge by screew press (DM 10%)	Product	0.0329	t wb/tADp	Foreground
			Decanter-centrifuge ANDRITZ D-Series	Steel, low-alloyed	0.000307692	kg/tADp	Background	Liquid fraction (waste water from decanter-centrifuge)	Product	0.0660165	t wb/tADp	Calculated
				Electricity, medium voltage, Sweden country-mix	0.10989	kWh/tADp	Background
	MAIN STREAM	TORWASH pretreatment	Biogenic residues	Enhanced Bio-sludge by screew press (DM 10%)	0.0329	t wb/tADp	Foreground	TORWASH effluent (8,5%)	Product	0.0386878	t wb/tADp	Foreground
			Tap water	additional diluition	0.00580317	t wb/tORP	Calculated	Hydrogen sulfide	Emission to Air	0.00270925	kg/tADp	Foreground
			Torwash reactor	Steel low alloyed	0.000307692	kg/tADp	Background
			IRON SPONGE BED technology for H2S Gas Cleaning	Iron pellet	0.00425352	kgFe2O3/tADp	Foreground
				Silica sand	0.00159817	kgSiO2/tADp	Foreground
				Oxygen, liquid	0.00127853	kgO2/tADp	Foreground
			Electricity/heat	Electricity, medium voltage, Sweden country-mix	0.2263	kWh/tADp	Calculated
		Dewatering by Limburg Filter-Press	Feedstock	TORWASH effluent (DM 8,5%)	0.038688	t wb/tADp	Foreground	SOLIDS (42,3% DM), press cake	Product	0.0114112	t wb/tADp	Foreground
				Fiber sludge stream (DM 1,65%)	0.0932	t wb/tADp	Foreground	FILTRATE (3 % DM), Liquid fraction	Product	0.120517	t wb/tADp	Calculated
			Limburg Filter-Press	Steel, low-alloyed	0.00120585	t db/tADp	Background/Foreground
				Polypropylene, granulate	0.000276215	kg db/tADp	Background/Foreground
				Electricity, medium voltage, Sweden country-mix	0.173239	kWh/tADp	Foreground
		Pelletizing	CMP Pellet production	SOLIDS (42,3% DM), press cake	0.0114112	t wb/tADp	Foreground	Pellet (MC 8%; DM 92%)	Product	0.00524666	t wb/tADp	Foreground
				Wood pellet production/kwh	0.444707	kWh/tADp	Foreground	Water evaporated	Emission to Air	0.00616451	t /tADp	Foreground
			Transport to the plant	Transport, freight, lorry >32 metric ton, EURO4	0.912893	tkm/tADp	Background	Water evaporated	Emission to Water	0.00616451	t /tADp	Foreground
			Storage and handling at the plant	Skid-steer loader 155 kW, Load capacity 5 m3	0.0163017	m3/tADp	Foreground/Background
	DOWNSTREAM	Biomass boiler	Combustion in boiler	Pellet (MC 8%; DM 92%)	0.00524666	t wb/tADp	Foreground	Energy-Heat-Steam	Product	82.1207	MJ/tADp	Foreground
				Transport, freight, lorry 16-32 metric ton, EURO4	0.524666	tkm/tADp	Background	Ash from paper production sludge	Waste to treatment	0.00197904	t/tADp	Foreground
				Heat, central or small-scale, other than natural gas for heat production, wood pellet, at furnace 300kW /kg pellet (LHV specific)	5.24666	kg wb/tADp	Background/Calculated
			Electricity/heat	Included in the energy consumption of the Heat Central Small Scale unit process
		Electric power production by Steam Turbine	Steam Turbine	Steel, low-alloyed	0.00085	kg/t ADp	Background	Electric power production	Product	4.56213	kWh/tADp	Background
			Electricity/heat	Energy-Heat-Steam	82.1207	MJ/tADp	Foreground	Heat, central or small-scale, natural gas	Avoided products	14.0286	kWh/tADp	Background/Calculated
	FILTRATE PROCESSING	Anaerobic digestion	Feedstock	FILTRATE_LMF-press (Liquid fraction), DM 3%	0.120517	twb/TADp	Foreground	Biogas from anaerobic digestion	Products	0.510088	Nm3/tADp	Foreground
			Biogas production process proxy	Biogas anaerobic digestion of manure /kg dig.	0.00747204	kg/tADp	Foreground	Digestate	Products	0.00747204	kg/tADp	Foreground
			IRON SPONGE BED technology for H2S Gas Cleaning	Iron pellet	0.00708855	kgFe2O3/tADp	Foreground	Urea as N	Avoided products	0.12521	kg/tADp	Background
				Silica sand	0.00266337	kgSiO2/tADp	Foreground	Phosphate fertiliser, as P2O5	Avoided products	0.205003	kg/tADp	Background
				Oxygen, liquid	0.00213069	kgO2/tADp	Foreground	Potassium sulfate, as K2O	Avoided products	0.0274182	kg/tADp	Background
		Electricity production from biogas	Feedstock	Biogas from anaerobic digestion	0.510088	m3/tADp	Calculated/Foreground	ELECTRICITY, HIGH VOLTAGE BY HEAT AND POWER CO-GENERATION, BIOGAS, GAS ENGINE-100%	Product	11.34	kWh/tADp	Background
			Gas engine	Electricity, high voltage (SE) heat and power co-generation, biogas, gas engine/m3 BIOGAS	0.510088	m3/tADp	Background	Heat, central or small-scale, natural gas	Avoided product - Scenario 100%	19.48	kWh/tADp	Background
									Avoided product - Scenario 54%	10.52	kWh/tADp	Background
		Transformation from High to Medium Voltage	Electricity High Voltage	ELECTRICITY, HIGH VOLTAGE BY HEAT AND POWER CO-GENERATION, BIOGAS, GAS ENGINE	11.34	kWh/tADp	Background	Electricity medium voltage from heat and power co-generation	Product	11.26	kWh/tADp	Background
			Electricity transforation	Electricity voltage transformation from high to medium voltage (SE)	11.34	kWh/tADp	Background

## Sheet: Table S2-Olive Pomace
		Process	Sub-process	Unit process - Input	Values	Units	Type of source	Unit process - Output	Sub-process	Values	Units	Type of source
	UPSTREAM	Preconditioning	Feedstock as received	Olive pomace (DM 19,63%)	1	t OP	Foreground	Pre-conditioned olive pomace (destoned and diluited), DM 5,75%	Product	2.0135	t wb/tOP	Foreground/Calculated
			Destoning	Steel, low-alloyed	0.00694	kg/tOP	Background	Olive's stones	Product	0.0805	t wb/tOP	Background
			Diluition	Tap water	1.094	kg/Top	Background
			Electricity/heat	Electricity, medium voltage, Italy country-mix	6.3427	kWh/top	Background/Foreground
	MAIN STREAM	TORWASH pretreatment	Biogenic residues	Pre-conditioned olive pomace (destoned and diluited), DM 5,75%	2.0135	t wb/tOP	Foreground	TORWASH effluent (DM 4,5 %)	Product	2.573	t wb/tOP	Foreground
			Tap water	additional diluition	0.559308	t wb/tORP	Calculated	Hydrogen sulfide	Emission to Air	0.00198261	kg/tOP	Foreground
			Hydrothermal treatment plant	Steel, low-alloyed	0.0103468	kg/tOP	Background
			IRON SPONGE BED technology for H2S Gas Cleaning	Iron pellet	0.00655802	kgFe2O3/tOP	Calculated
				Silica sand	0.00246403	kgSiO2/tOP	Calculated
				Oxygen, liquid	0.00197123	kgO2/tOP	Calculated
			Electricity/heat	Electricity, medium voltage, IT country-mix	10.8729	kWh/tOP	Calculated
		Dewatering	Dewatering by Limburg Filter-Press	TORWASH effluent (DM 4,5 %)	2.573	t wb/tOP	Foreground	SOLIDS (58,36% DM), press cake	Product	0.198384	t wb/tOP	Foreground
								FILTRATE (1,8 % DM), Liquid fraction	Product	2.37443	t wb/tOP	Foreground/Calculated
			Limburg Filter-Press	Steel, low-alloyed	0.0239427	kg/tOP	Background
				Polypropylene, granulate	0.0246645	kg/t ORP	Background
			Electricity/heat	Electricity, medium voltage, IT country-mix	3.08738	kWh/tOP	Foreground
		Pelletting	CMP Pellet production	SOLIDS (58,36% DM), press cake	0.198384	t wb/tOP	Foreground	Pellet (MC 8%; DM 92%)	Product	0.125844	t wb/tOP	Foreground
				Wood pellet production/kwh	7.94832	kWh/tOP	Foreground/Background	Water evaporated	Emission to Air	0.0725394	t /tORP	Calculated
			Transport to the plant	Transport, freight, lorry >32 metric ton, EURO4	15.8707	tkm/tOP	Background	Water evaporated	Emission to Water	0.0725394	t /tORP	Calculated
			Storage and handling at the plant	Skid-steer loader 155 kW, Load capacity 5 m3	0.330639	m3/tORP	Foreground
	DOWNSTREAM	Electricity production from pellet	Feedstock	Pellet (MC 8%; DM 92%)	0.125844	t wb/tOP	Foreground	Electricity high voltage from heat and power co-generation	Product	1608.56	kWh el/tOP	Foreground/Calculated
			Biomass conversion process	Electricity, high voltage {IT}| heat and power co-generation, wood chips/MJ	3309.7	MJ/tOP	Calculated	Heat, central or small-scale, natural gas	Avoided product - Scenario 100%	4825.68	kWh th/tOP	Background
									Avoided product - Scenario80%	3860.55	kWh th/tOP	Background
		Transformation from High to Medium Voltage	Electricity High Voltage	Electricity, medium voltage {IT}| electricity voltage transformation from high to medium voltage	1608.56	kWh/tORP	Background	Electricity medium voltage from heat and power co-generation	Product	1599.76	kWh/tOP	Background
			Electricity transforation	Electricity, medium voltage {IT}| electricity voltage transformation from high to medium voltage	1608.56	kWh/tORP	Background
	FILTRATE PROCESSING	Anaerobic digestion	Feedstock	FILTRATE (1,8 % DM), Liquid fraction	2.37443	t wb/tOP	Foreground/Calculated	Biogas from anaerobic digestion	Products	23.9016	Nm3/tOP	Foreground/Caculated
			Biogas production process proxy	Biogas anaerobic digestion of manure /kg dig.	0.0010592	kg/tOP	Foreground	Digestate	Products	0.0010592	kg/tOP	Foreground
			Digestate spreading	Fertilising, by broadcaster/kg diesel	0.000469856	kg/t OP	Background	Urea as N	Avoided products	1.77493e-05	kg/tOP	Background
			IRON SPONGE BED technology for H2S Gas Cleaning	Iron pellet	0.0094514	kgFe2O3/tOP	Foreground	Phosphate fertiliser, as P2O5	Avoided products	2.90605e-05	kg/tOP	Background
				Silica sand	0.00355116	kgSiO2/tOP	Foreground	Potassium sulfate, as K2O	Avoided products	3.8867e-06	kg/tOP	Background
				Oxygen, liquid	0.00284092	kgO2/tOP	Foreground
		Electricity production from biogas	Feedstock	Biogas from anaerobic digestion	23.9016	Nm3/tOP	Calculated/Foreground	ELECTRICITY, HIGH VOLTAGE BY HEAT AND POWER CO-GENERATION, BIOGAS, GAS ENGINE	Product	467.105	kWh/tOP	Background
			Gas engine	Electricity, high voltage (IT) heat and power co-generation, biogas, gas engine/m3 BIOGAS	23.9016	Nm3/tOP	Background	Heat, central or small-scale, natural gas	Avoided product - Scenario 100%	802.837	kWh/tOP	Background
									Avoided product - Scenario 80%	642.27	kWh/tOP	Background
		Transformation from High to Medium Voltage	Electricity High Voltage	ELECTRICITY, HIGH VOLTAGE BY HEAT AND POWER CO-GENERATION, BIOGAS, GAS ENGINE	467.105	kWh/tOP	Background	Electricity medium voltage from heat and power co-generation	Product	464.55	kWh/tOP	Background
			Electricity transforation	Electricity voltage transformation from high to medium voltage (IT)	467.105	kWh/tOP	Background

## Sheet: Table S3-Orange Peels
		Process	Sub-process	Unit process - Input	Values	Units	Type of Source	Unit process - Output	Sub-process	Values	Units	Type of source
	UPSTREAM	Preconditioning	Feedstock as received	Oramge peels (DM 20%)	1	t ORP	Foreground	Pre-conditioned orange peels (grinded and diluited) DM 3,86%	Product	5.18135	t wb/tORP	Foreground/Calculated
			Grinding	Steel, low-alloyed	0.0289855	kg/tORP	Background
			Diluition	Tap water	4.18135	kg/tORP	Calculated
			Electricity/heat	Electricity, medium voltage, Spain country-mix	5.12611	kWh/tORP	Background/Foreground
	MAIN STREAM	TORWASH pretreatment	Biogenic residues	Pre-conditioned orange peels (grinded and diluited) DM 3,86%	5.18135	t wb/tORP	Foreground	TORWASH effluent (DM 2,63 %)	Product	7.60456	t wb/tORP	Foreground
				Tap water	2.42322	t wb/tORP	Calculated	Hydrogen sulfide	Emission to Air	0.04	kg/tORP	Foreground
			Hydrothermal treatment plant	Steel, low-alloyed	0.0167826	kg/tOP	Background
			IRON SPONGE BED technology for H2S Gas Cleaning	Iron pellet	0.0628	kgFe2O3/tORP	Foreground
				Silica sand	0.0235957	kgSiO2/tORP	Foreground
				Oxygen, liquid	0.0188766	kgO2/tORP	Foreground
			Electricity/heat	Electricity, medium voltage, Spain country-mix	27.9793	kWh/tORP	Calculated
		Dewatering	Dewatering by Limburg Filter-Press	TORWASH effluent (DM 2,63 %)	7.60456	t wb/tORP	Foreground	SOLIDS (42% DM), press cake	Product	0.47619	t wb/tORP	Foreground
								FILTRATE (1,59 % DM), Liquid fraction	Product	7.12837	t wb/tORP	Foreground/Calculated
			Limburg Filter-Press	Steel, low-alloyed	0.0999348	kg/tORP	Background
				Polypropylene, granulate	0.10988	kg/t ORP	Background
			Electricity/heat	Electricity, medium voltage, Spain country-mix	9.12548	kWh/tOP	Foreground
		Pelletization	CMP Pellet production	SOLIDS (42% DM), press cake	0.47619	t wb/tORP	Foreground	Pellet (MC 8%; DM 92%)	Product	0.217391	t wb/tORP	Foreground
				Wood pellet production/kwh	20.4478	t wb/tORP	Foreground/Background	Water evaporated	Emission to Air	0.258799	t /tORP	Calculated
			Transport to the plant	Transport, freight, lorry >32 metric ton, EURO4	38.0952	t wb/tORP	Background	Water evaporated	Emission to Water	0.258799	t /tORP	Calculated
			Storage and handling at the plant	Skid-steer loader 155 kW, Load capacity 5 m3	0.793651	t wb/tORP	Foreground
	DOWNSTREAM	Electricity production from pellet	Feedstock	Pellet (MC 8%; DM 92%)	0.217391	t wb/tORP	Foreground	Electricity high voltage from heat and power co-generation	Product	2345.54	kWh el/tORP	Foreground/Calculated
			Biomass conversion process	Electricity, high voltage {ES}| heat and power co-generation, wood chips/MJ	4826.09	MJ/tORP	Calculated	Heat, central or small-scale, natural gas	Avoided product - Scenario 100%	7036.63	kWh th/tORP	Background
									Avoided product - Scenario 54%	3799.78	kWh th/tORP	Background
		Transformation from High to Medium Voltage	Electricity High Voltage	Electricity, medium voltage {ES}| electricity voltage transformation from high to medium voltage	2345.54	kWh/tORP	Background	Electricity medium voltage from heat and power co-generation	Product	2326.47	kWh/tORP	Background
			Electricity transforation	Electricity, medium voltage {ES}| electricity voltage transformation from high to medium voltage	2345.54	kWh/tORP	Background
	FILTRATE PROCESSING	Anaerobic digestion	Feedstock	FILTRATE (1,59 % DM), Liquid fraction	7.12837	t wb/tORP	Foreground/Calculated	Biogas from anaerobic digestion	Products	162.854	Nm3/tORP	Foreground/Caculated
			Biogas production process proxy	Biogas anaerobic digestion of manure /kg dig.	0.415538	kg/tORP	Foreground	Digestate	Products	0.415538	kg/tORP	Foreground
			IRON SPONGE BED technology for H2S Gas Cleaning	Iron pellet	0.288268	kgFe2O3/tORP	Foreground	Urea as N	Avoided products	0.00696328	kg/tORP	Background
				Silica sand	0.10831	kgSiO2/tORP	Foreground	Phosphate fertiliser, as P2O5	Avoided products	0.0114008	kg/tORP	Background
				Oxygen, liquid	0.0866482	kgO2/tORP	Foreground	Potassium sulfate, as K2O	Avoided products	0.0015248	kg/tORP	Background
			Digestate landfarming	Fertilising, by broadcaster/kg diesel	0.00018433	kg/t ORP	Background
		Electricity production from biogas	Feedstock	Biogas from anaerobic digestion	162.854	Nm3/tORP	Calculated/Foreground	ELECTRICITY, HIGH VOLTAGE BY HEAT AND POWER CO-GENERATION, BIOGAS, GAS ENGINE	Product	2903.16	kWh/tORP	Background
			Gas engine	Electricity, high voltage (ES) heat and power co-generation, biogas, gas engine/m3 BIOGAS	162.854	Nm3/tORP	Background	Heat, central or small-scale, natural gas	Avoided product - Scenario 100%	4989.81	kWh/tORP	Background
									Avoided product - Scenario 54%	2694.5	kWh/tORP	Background
		Transformation from High to Medium Voltage	Electricity High Voltage	ELECTRICITY, HIGH VOLTAGE BY HEAT AND POWER CO-GENERATION, BIOGAS, GAS ENGINE	2903.16	kWh/tORP	Background	Electricity medium voltage from heat and power co-generation	Product	2887.28	kWh/tORP	Background
			Electricity transforation	Electricity voltage transformation from high to medium voltage (ES)	2903.16	kWh/tORP	Background
